# Supplementary material
Source: PubMed Central journal article supplement (PMC1502439)

**MW (kDa)**

**100** |

**72** |

**AceCS2**

**AceCS2-**

**K642Q**

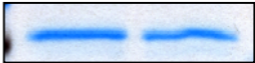

**Coomassie**

Supplement: pnas_0603968103_1.pdf [file pnas_0603968103_1.pdf]

**siRNA:**

**Control**

**SIRT3**

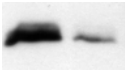

**IB: SIRT3**

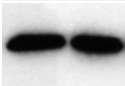

**IB: Actin**

Supplement: pnas_0603968103_2.pdf [file pnas_0603968103_2.pdf]

Relative Abundance

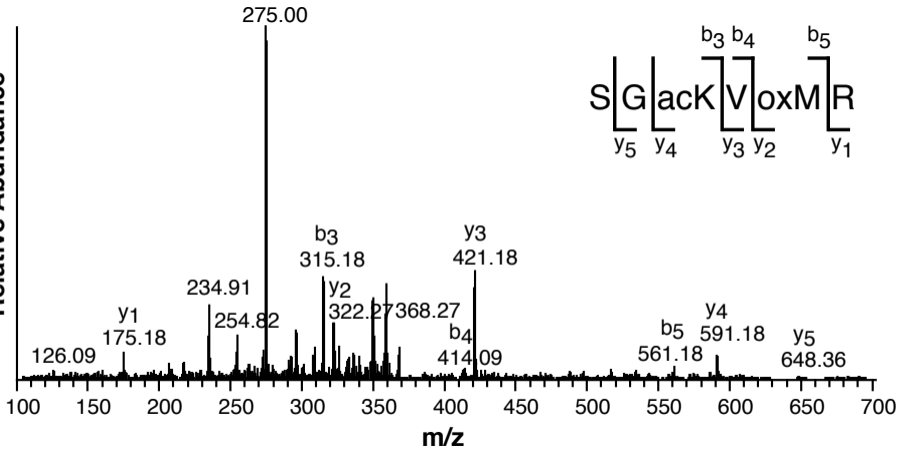

Supplement: pnas_0603968103_3.pdf [file pnas_0603968103_3.pdf]

**ack642**

**K642**

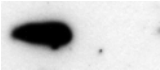

**IB: acetyl-lysine**

Supplement: pnas_0603968103_4.pdf [file pnas_0603968103_4.pdf]

Relative Abundance

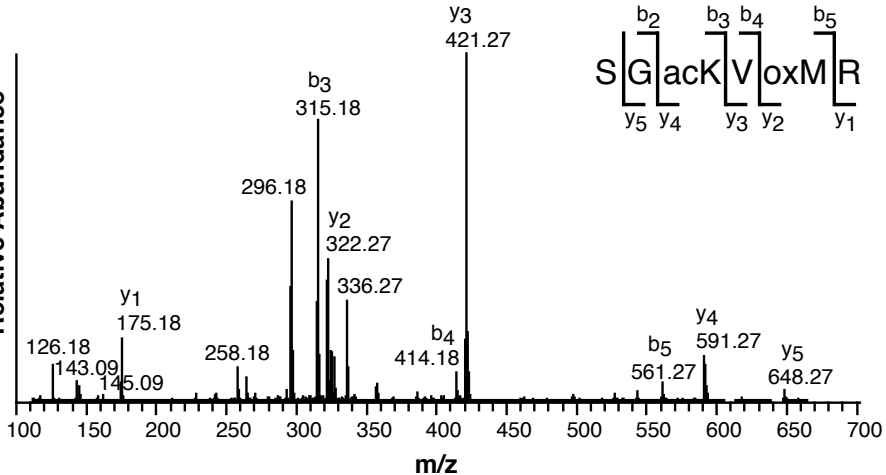

Supplement: pnas_0603968103_5.pdf [file pnas_0603968103_5.pdf]
